# Supplementary material
Source: ML conference proceedings conference paper supplement (https://openreview.net/forum?id=GproaSYZk5)
Supplement: supplementary_material [file attachment]

```
In [ ]: %load_ext autoreload
%autoreload 2

import lsrl
import numpy as np
```

/homes/cdt21/aleks/.local/lib/python3.10/site-packages/matplotlib/projections/\_\_init\_\_.py:63: UserWarning: Unable to import Axes3D. This may be due to multiple versions of Matplotlib being installed (e.g. as a system package and as a pip package). As a result, the 3D projection is not available.  
warnings.warn("Unable to import Axes3D. This may be due to multiple versions of "

Let's define a simple program that takes a string of 0s and 1s and returns 1 if there are more 1s until this point or 0 otherwise:

```
In [ ]: input = lsrl.Input(dim=1)
counter_ones = lsrl.LinState(
    input,
    A=lsrl.Matrix.ones(1,1),
    B=lsrl.Matrix.ones(1,1),
    init_state=lsrl.Matrix.zeros(1,1),
    name="Counter1s"
)
is_zero = lsrl.f_not(input) #equivalent to 1-input
counter_zeros = lsrl.LinState(
    is_zero,
    A=lsrl.Matrix.ones(1,1),
    B=lsrl.Matrix.ones(1,1),
    init_state=lsrl.Matrix.zeros(1,1),
    name="Counter0s",
)
output = lsrl.f_larger(counter_ones, counter_zeros) # equivalent to f_step(counter_ones - counter_zeros)

loop = lsrl.ForEach(output)
```

We can now test that it works as expected.

```
In [ ]: # generate a test input
input_values = np.random.randint(0, 2, 10)
expected_output = np.array([1 if np.sum(input_values[:i]) > i/2 else 0 for i in range(1, len(input_values)+1)])
generated = loop(input_values[None, :]).numpy().flatten()
if np.all(generated == expected_output):
    print("Prediction is correct!")
else:
    print("Error encountered...")
print("Input:")
print(input_values)
print("Expected:")
print(expected_output)
print("Model output:")
print(generated.astype(int))
```

```
Prediction is correct!
Input:
[0 1 1 0 0 0 1 1 0 0]
Expected:
[0 0 1 0 0 0 0 0 0 0]
Model output:
[0 0 1 0 0 0 0 0 0 0]
```

Plot the computation graph of the program before debranching

```
In [ ]: lsrl.utils.plot_and_save_graph(loop.graph(), figsize=(5,10))
```

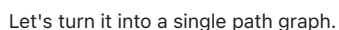

```

0/7
1. fold_state_after_linear ReLU: 2, Concat: 2, LinState: 2, Linear: 5, Input: 1 (Total: 12 nodes). MaxBranches: 2. Progress:
2. before_debranching ReLU: 2, Concat: 2, LinState: 2, Linear: 5, Input: 1 (Total: 12 nodes). MaxBranches: 2. Progress: 0/7
3. only_states ReLU: 2, Slice: 2, Concat: 2, LinState: 1, Linear: 5, Input: 1 (Total: 13 nodes). MaxBranches: 2. Progress: 1/
8
4. slice_into_next ReLU: 2, Concat: 2, LinState: 1, Linear: 6, Input: 1 (Total: 12 nodes). MaxBranches: 2. Progress: 4/8
4/8
5. fold_concat_to_duplicate ReLU: 2, Concat: 1, LinState: 1, Linear: 7, Input: 1 (Total: 12 nodes). MaxBranches: 2. Progress:
6. fold_conseq_linear ReLU: 2, Concat: 1, LinState: 1, Linear: 6, Input: 1 (Total: 11 nodes). MaxBranches: 2. Progress: 3/7
7. fold_conseq_linear ReLU: 2, Concat: 1, LinState: 1, Linear: 5, Input: 1 (Total: 10 nodes). MaxBranches: 2. Progress: 2/6
8. only_linear_nonslice ReLU: 2, Slice: 2, Concat: 1, LinState: 1, Linear: 4, Input: 1 (Total: 11 nodes). MaxBranches: 2. Pro
gress: 3/7
9. fold_conseq_linear ReLU: 2, Slice: 2, Concat: 1, LinState: 1, Linear: 3, Input: 1 (Total: 10 nodes). MaxBranches: 2. Progr
ess: 2/6
10. slice_into_next ReLU: 2, Slice: 2, Concat: 1, LinState: 1, Linear: 3, Input: 1 (Total: 10 nodes). MaxBranches: 2. Progress
: 2/6
11. fold_conseq_linear ReLU: 2, Slice: 1, Concat: 1, LinState: 1, Linear: 3, Input: 1 (Total: 9 nodes). MaxBranches: 2. Progre
ss: 2/6
12. only_relus ReLU: 1, Slice: 1, Concat: 1, LinState: 1, Linear: 3, Input: 1 (Total: 8 nodes). MaxBranches: 2. Progress: 3/6
13. only_linear_nonslice ReLU: 1, Slice: 2, Concat: 1, LinState: 1, Linear: 3, Input: 1 (Total: 9 nodes). MaxBranches: 2. Prog
ress: 4/7
14. slice_into_next ReLU: 1, Concat: 1, LinState: 1, Linear: 4, Input: 1 (Total: 8 nodes). MaxBranches: 1. Progress: 7/7
15. fold_concat_to_duplicate Input: 1, ReLU: 1, Linear: 5, LinState: 1 (Total: 8 nodes). MaxBranches: 1. Progress: 7/7
16. fold_conseq_linear Input: 1, ReLU: 1, Linear: 4, LinState: 1 (Total: 7 nodes). MaxBranches: 1. Progress: 6/6
17. fold_conseq_linear Input: 1, ReLU: 1, Linear: 3, LinState: 1 (Total: 6 nodes). MaxBranches: 1. Progress: 5/5
18. fold_conseq_linear Input: 1, ReLU: 1, Linear: 2, LinState: 1 (Total: 5 nodes). MaxBranches: 1. Progress: 4/4

```

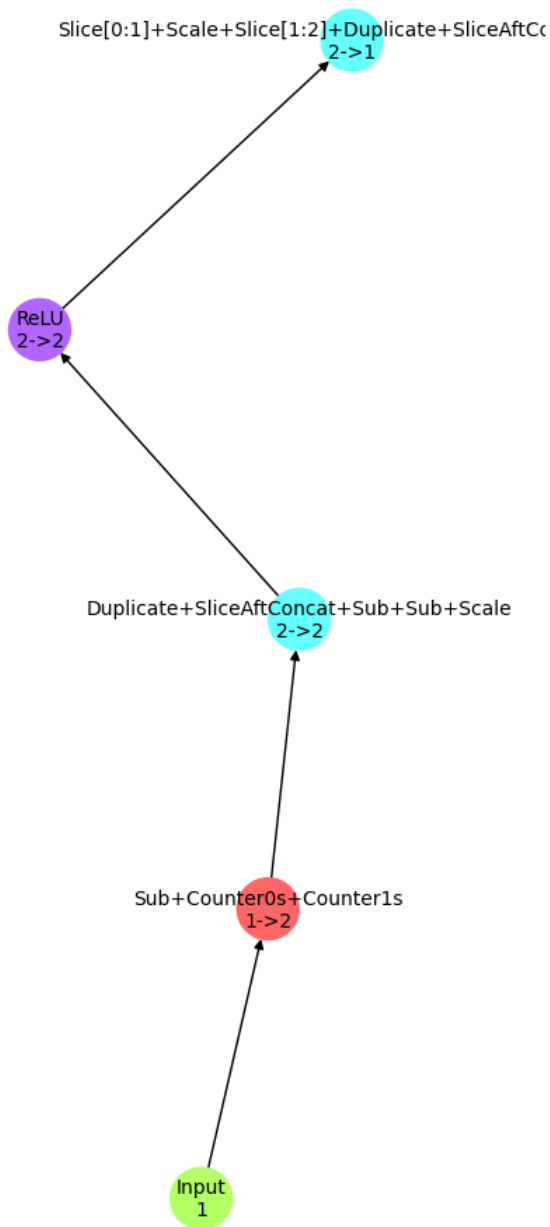

Extract the underlying model:

```

In [ ]: for layer_idx, layer in enumerate(loop.topological_sort()):
        if isinstance(layer, lsrl.Input):
            print(f"{layer_idx+1:>2}. Input")
        elif isinstance(layer, lsrl.LinState):
            print(f"{layer_idx+1:>2}. Linear State")
            print("A:")
            print(layer.A.numpy())
            print("B:")
            print(layer.B.numpy())
            print("bias:")
            print(layer.bias.numpy())
            print("init_state:")
            print(layer.init_state.numpy())
        elif isinstance(layer, lsrl.Linear):
            print(f"{layer_idx+1:>2}. Linear")
            print("A:")
            print(layer.A.numpy())
            print("b:")
            print(layer.b.numpy())
        elif isinstance(layer, lsrl.ReLU):
            print(f"{layer_idx+1:>2}. ReLU")
        print()
  
```

1. Input

2. Linear State

A:

```
[[1. 0.]  
 [0. 1.]]
```

B:

```
[[ -1.]  
 [ 1.]]
```

bias:

```
[[1.]  
 [0.]]
```

init\_state:

```
[[0.]  
 [0.]]
```

3. Linear

A:

```
[[ -1.    1.]  
 [-1000. 1000.]]
```

b:

```
[[ -0.001]  
 [ 0.    ]]
```

4. ReLU

5. Linear

A:

```
[[ -1000.    1.]]
```

b:

```
[[0.]]
```

In [ ]:
